# Supplementary material for: How changes in Cu-SSZ-13 catalytic oxidation activity via mild hydrothermal aging influence sulfur poisoning extents
Source: Royal Society of Chemistry journal article supplement (doi:10.1039/d2cy01394k), 2022-01-01
Supplement: d2cy01394k1.pdf [file d2cy01394k1.pdf]

## SUPPORTING INFORMATION

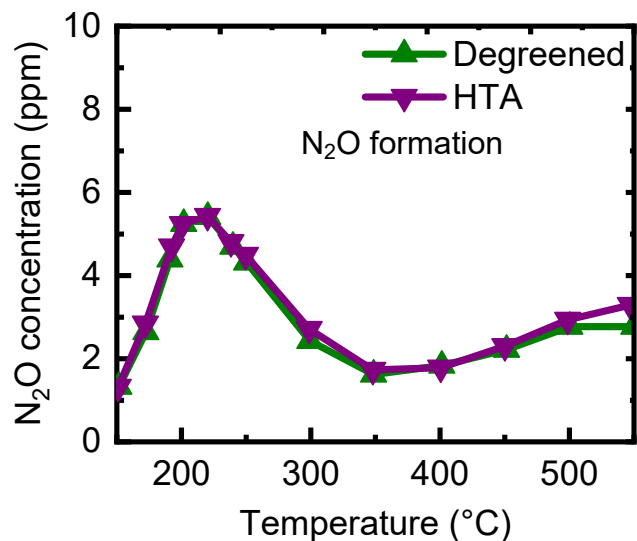

Fig. S1. N<sub>2</sub>O formation comparison between degreened and HTA pretreated Cu-SSZ-13 catalysts during NH<sub>3</sub>-SCR reactions.

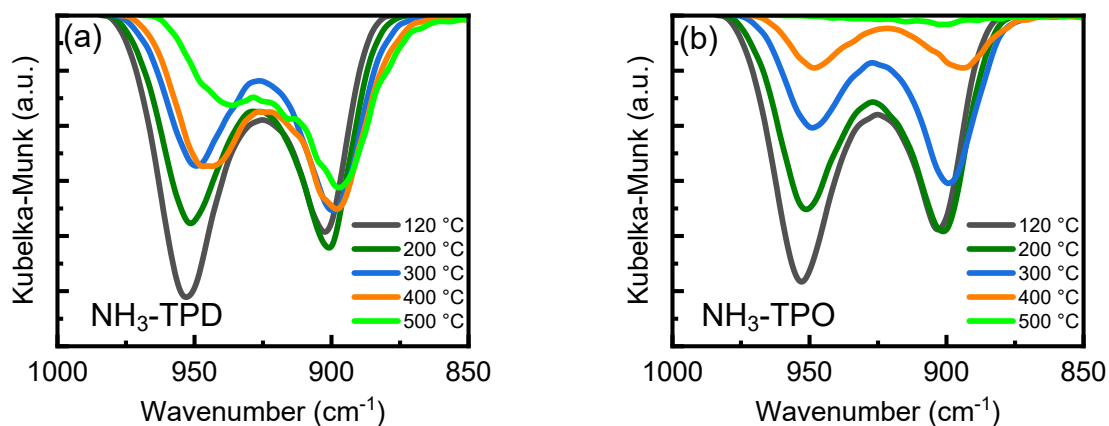

Fig. S2. DRIFTS results obtained during (a) NH<sub>3</sub>-TPD and (b) NH<sub>3</sub>-TPO experiments on the Cu-SSZ-13 catalyst after scraping from a monolith brick. Both experiments were conducted after oxygen pretreated at 500 °C for 1 h, cooling to 120 °C in He and then 1000 ppm NH<sub>3</sub> balance in He. For the TPD, He was used while 10% O<sub>2</sub> balance in He was used in the TPO experiment. The temperature ramp was 10 °C/min.

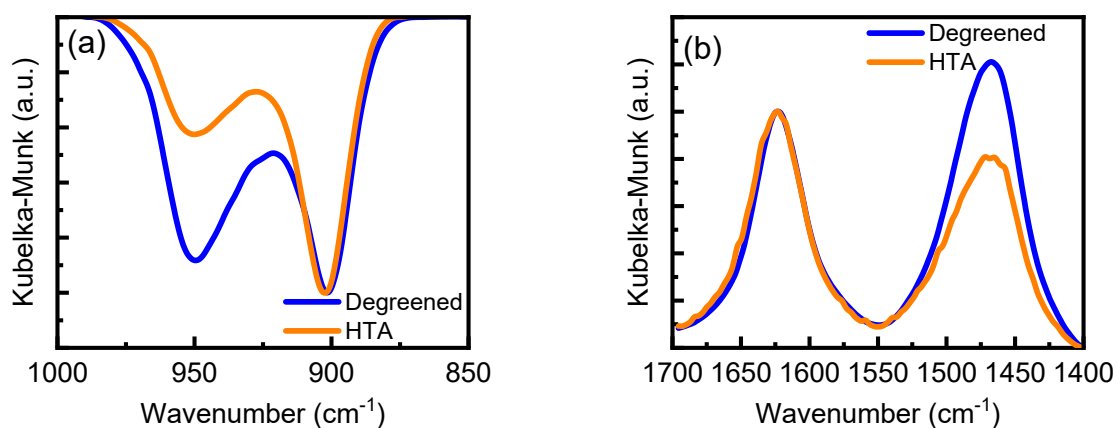

Fig. S3. DRIFTS NH<sub>3</sub> adsorption spectra comparison between the degreened and HTA catalysts in (a) the T-O-T vibration region and (b) the Brønsted and Lewis acid sites region. The spectra were normalized separately in these two regions. In (a), the spectra were normalized using the 900 cm<sup>-1</sup> feature while in (b), the spectra were normalized using the 1620 cm<sup>-1</sup> feature.

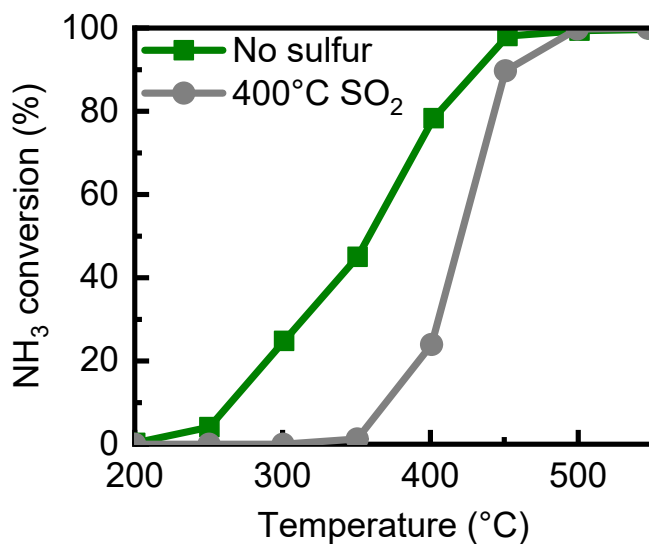

Fig. S4. NH<sub>3</sub> oxidation conversion over the degreened catalyst before and after sulfur exposure at 400 °C SO<sub>2</sub>. During the NH<sub>3</sub> oxidation experiment, 10% O<sub>2</sub>, 7% H<sub>2</sub>O, 8% CO<sub>2</sub>, 200 ppm NH<sub>3</sub> and balance in N<sub>2</sub> were used.

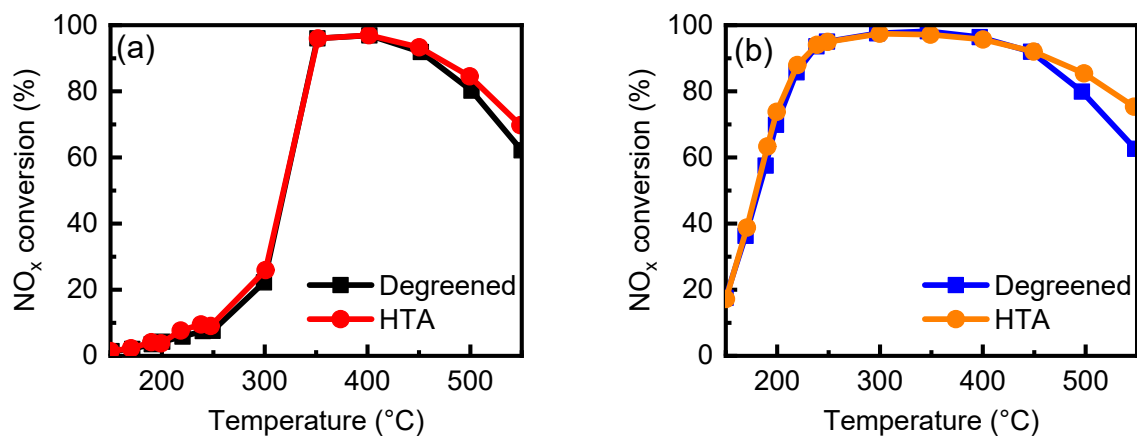

Fig. S5. A comparison of SCR results after (a) 25 ppm SO<sub>2</sub> and 25 ppm SO<sub>3</sub> exposure at 200 °C and after (b) 50 ppm SO<sub>2</sub> exposure at 200 °C for the degreened and HTA catalysts. The SCR reaction conditions are described in Table 1.

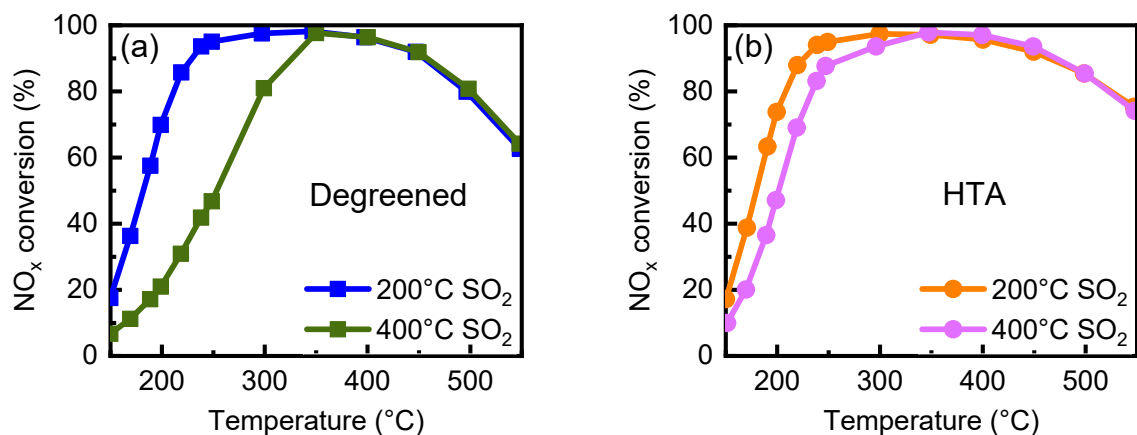

Fig. S6. A comparison of SCR results after a 50 ppm SO<sub>2</sub> exposure at 200 and 400 °C on the (a) degreened and (b) HTA catalysts. The SCR reaction conditions are described in Table 1.

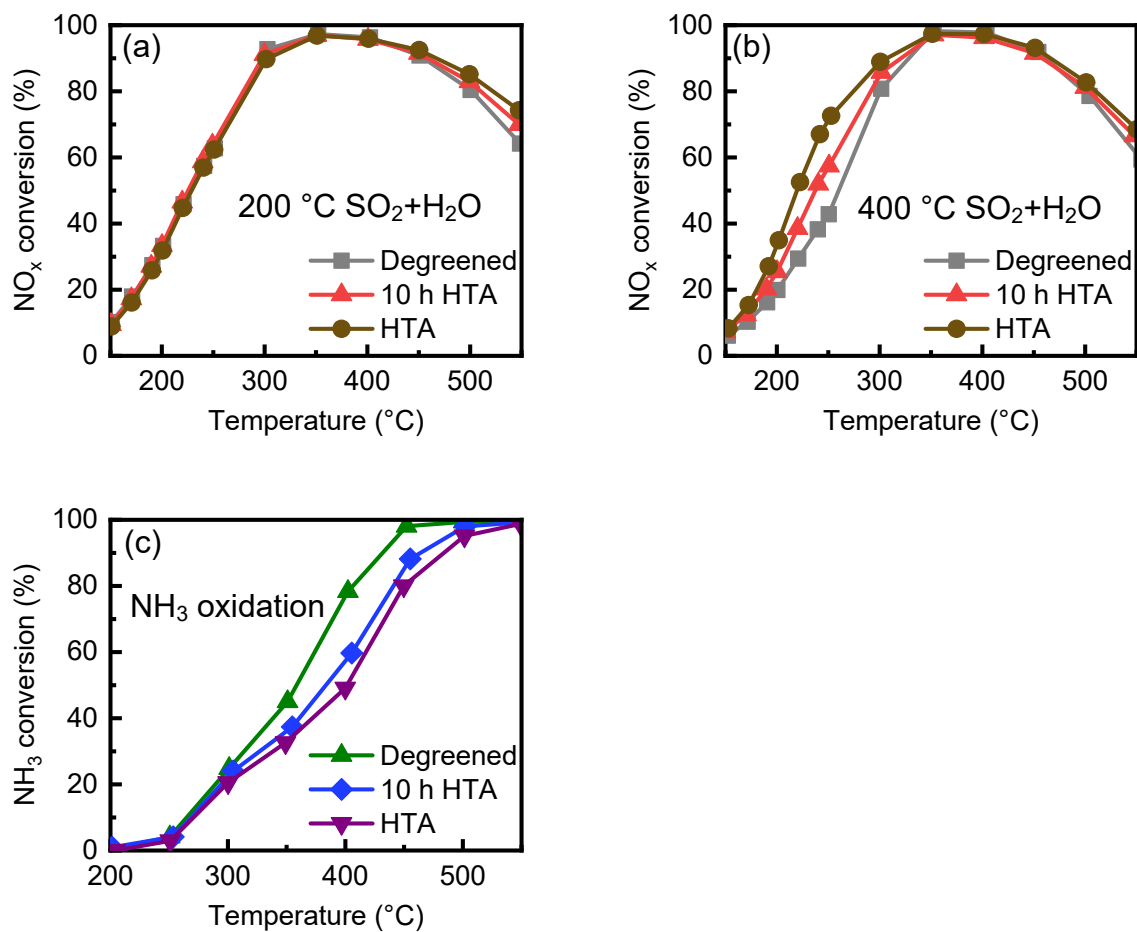

Fig. S7. A comparison of degreened, 10 h HTA and HTA (for 25 h) samples after (a) 200 °C and (b) 400 °C SO<sub>2</sub>+H<sub>2</sub>O exposure. The NH<sub>3</sub> oxidation comparison before sulfur exposure between three samples is shown in (c). The SCR and NH<sub>3</sub> oxidation conditions are listed in the experimental methods session.

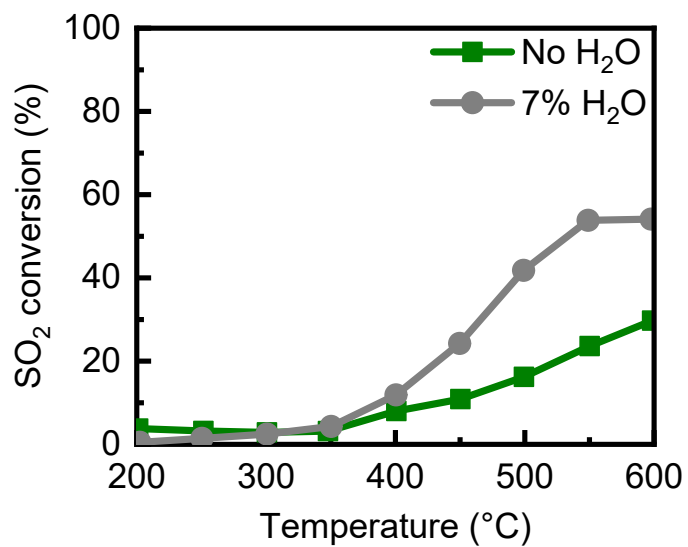

Fig. S8. SO<sub>2</sub> oxidation over the degreened catalyst. The SO<sub>2</sub> oxidation conditions in the absence of water were 50 ppm SO<sub>2</sub>, 10% O<sub>2</sub> and balance in N<sub>2</sub> and the SO<sub>2</sub> oxidation conditions in the presence of water were 50 ppm SO<sub>2</sub>, 10% O<sub>2</sub>, 7% H<sub>2</sub>O and balance in N<sub>2</sub>.
